# Supplementary material for: Bacillus Intervention: Microbial Ecological Mechanisms for Controlling Root Rot in Coptis chinensis Franch
Source: Research Square preprint supplement (doi:10.21203/rs.3.rs-3933598/v1), 2024-02-16
Supplement: Supplementary file 1 [file 73cfcdf27b3a7feeb6e34c69.xlsx]

## Sheet: Sheet1
supplementary tables 1 Root microbial network properties of Cc under different treatments
Network properties	BCA7dFs7d	BCA7d	CK	Fs7d	Fs7dBCA7d
Number of nodes	103	102	110	110	93
Number of edges	316	240	830	1072	416
Avg. number of neighbors	6.136	4.706	15.091	19.491	8.946
Network diameter	7	7	7	7	7
Characteristic path length	2.332	2.168	2.542	2.361	2.37
Clustering coefficient	0.272	0.239	0.378	0.325	0.254
Network density	0.03	0.023	0.069	0.089	0.049
